# Supplementary material for: Ferroelectricity of poly(vinylidene fluoride) homopolymer Langmuir–Blodgett nanofilms
Source: Royal Society of Chemistry journal article supplement (doi:10.1039/c4tc00600c), 2014-01-01
Supplement: c4tc00600c1.pdf [file c4tc00600c1.pdf]

## Supplementary Information

### Ferroelectricity of Poly(vinylidene fluoride) Homopolymer Langmuir–Blodgett Nanofilms

Huie Zhu,<sup>a</sup> Shunsuke Yamamoto,<sup>a</sup> Jun Matsui,<sup>b</sup> Tokuji Miyashita,<sup>a</sup> Masaya Mitsuishi\*<sup>a</sup>

<sup>a</sup>*Institute of Multidisciplinary Research for Advanced Materials (IMRAM), Tohoku University, 2-1-1 Katahira, Aoba-ku, Sendai 980-8577, Japan E-mail: masaya@tagen.tohoku.ac.jp*

<sup>b</sup>*Department of Material and Biological Chemistry, Faculty of Science, Yamagata University, Kojirakawamachi 1-4-12, Yamagata 990-560, Japan*

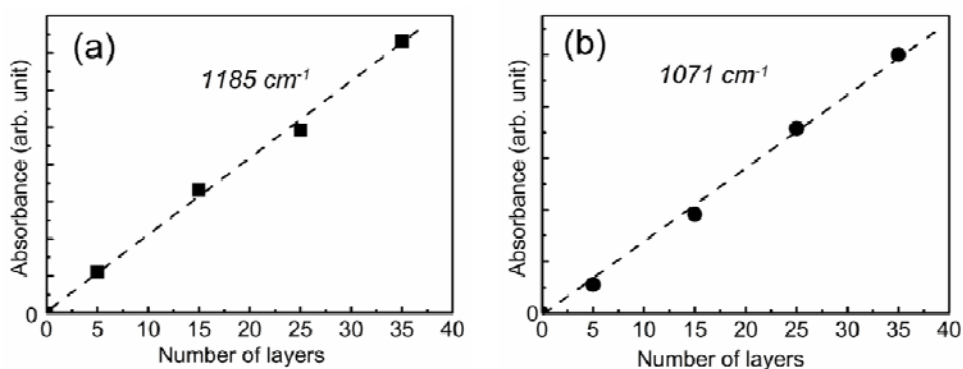

**Figure S1.** The FT-IR absorbance at (a) 1185 and (b) 1071  $\text{cm}^{-1}$  as a function of the number of layers.
